# Supplementary material for: Novel Radiofrequency Ablation Strategies for Terminating Atrial Fibrillation in the Left Atrium: A Simulation Study
Source: PubMed Central journal article supplement (PMC4828663; doi:10.3389/fphys.2016.00108), 2016-04-12
Supplement: Presentation1.pdf [file Presentation1.pdf]

# Supplementary Material: Novel radiofrequency ablation strategies for terminating atrial fibrillation in the left atrium: a simulation study

Jason D. Bayer, Caroline H. Roney, Ali Pashaei, Pierre Jaïs and Edward J. Vigmond

\*Correspondence:

Author Name: Jason D. Bayer  
jason.bayer@ihu-liryc.fr

## 1 SUPPLEMENTARY TABLES AND FIGURES

**Supplementary Table 1.** Maximal conductances for ionic currents ( $g_x$ ) in the Courtemanche-Ramirez-Nattel ionic model Courtemanche et al. (1998) of the atrial bilayer model *without* pAF.

| Anatomical region | Maximal ionic conductances (pS/pF) |          |          |          |          |                |
|-------------------|------------------------------------|----------|----------|----------|----------|----------------|
|                   | $g_{CaL}$                          | $g_{to}$ | $g_{Kr}$ | $g_{Ks}$ | $g_{K1}$ | $g_{Kur}(V_m)$ |
| Default           | 0.1238                             | 0.1652   | 0.0294   | 0.129    | 0.072    | x 1.0          |
| LA                | 0.1238                             | 0.1652   | 0.0470   | 0.129    | 0.072    | x 1.0          |
| LAA               | 0.1312                             | 0.1123   | 0.0470   | 0.129    | 0.072    | x 1.0          |
| RAA               | 0.1312                             | 0.1123   | 0.0294   | 0.129    | 0.072    | x 1.0          |
| CTS               | 0.2067                             | 0.2115   | 0.0294   | 0.129    | 0.072    | x 1.0          |
| BB                | 0.2067                             | 0.2115   | 0.0294   | 0.129    | 0.072    | x 1.0          |
| PM                | 0.1238                             | 0.1652   | 0.0294   | 0.129    | 0.072    | x 1.0          |
| PV                | 0.0928                             | 0.1239   | 0.0706   | 0.241    | 0.060    | x 1.0          |

**Supplementary Table 2.** Maximal conductances for ionic currents ( $g_x$ ) in the Courtemanche-Ramirez-Nattel ionic model Courtemanche et al. (1999) of the atrial bilayer model *with* pAF.

| Anatomical region | Maximal ionic conductances (pS/pF) |          |          |          |          |                |
|-------------------|------------------------------------|----------|----------|----------|----------|----------------|
|                   | $g_{CaL}$                          | $g_{to}$ | $g_{Kr}$ | $g_{Ks}$ | $g_{K1}$ | $g_{Kur}(V_m)$ |
| Default           | 0.0371                             | 0.0826   | 0.0294   | 0.129    | 0.072    | x 0.5          |
| LA                | 0.0371                             | 0.0826   | 0.0470   | 0.129    | 0.072    | x 0.5          |
| LAA               | 0.0394                             | 0.0562   | 0.0470   | 0.129    | 0.072    | x 0.5          |
| RAA               | 0.0394                             | 0.0562   | 0.0294   | 0.129    | 0.072    | x 0.5          |
| CTS               | 0.0620                             | 0.1058   | 0.0294   | 0.129    | 0.072    | x 0.5          |
| BB                | 0.0620                             | 0.1058   | 0.0294   | 0.129    | 0.072    | x 0.5          |
| PM                | 0.0371                             | 0.0826   | 0.0294   | 0.129    | 0.072    | x 0.5          |
| PV                | 0.0278                             | 0.0620   | 0.0706   | 0.241    | 0.060    | x 0.5          |
| SAN               | 0.1238                             | 0.1652   | 0.0294   | 0.129    | 0.072    | x 1.0          |

**Supplementary Table 3.** Longitudinal ( $g_l$ ) and transverse ( $g_t$ ) tissue conductivities for the atrial bilayer models without and with pAF.

| Anatomical region                  | Conductivity (S/m) |       |
|------------------------------------|--------------------|-------|
|                                    | $g_l$              | $g_t$ |
| <i>Triangular tissue elements:</i> |                    |       |
| Default                            | 0.400              | 0.107 |
| SAN                                | 0.392              | 0.392 |
| SAN line of block                  | 0.001              | 0.001 |
| IVC                                | 0.001              | 0.001 |
| CTS                                | 0.492              | 0.075 |
| PM                                 | 0.698              | 0.030 |
| BB                                 | 0.702              | 0.181 |
| Fibrosis                           | Elements removed   |       |
| Ablation                           | 0.001              | 0.001 |
| <i>Linear bilayer connections:</i> |                    |       |
| CT-RA                              | 1.054              | 1.054 |
| ENDO-EPI LA                        | 0.326              | 0.326 |
| BB-ENDO LA                         | 3.000              | 3.000 |
| BB-ENDO RA                         | 3.000              | 3.000 |
| PM-RA                              | 1.054              | 1.054 |
| BB-EPI LA                          | 3.000              | 3.000 |
| SAN-SVC                            | 1000               | 1000  |
| SAN-IVC                            | 400                | 400   |
| SAN-RAA                            | 825                | 825   |
| SAN-RA                             | 825                | 825   |

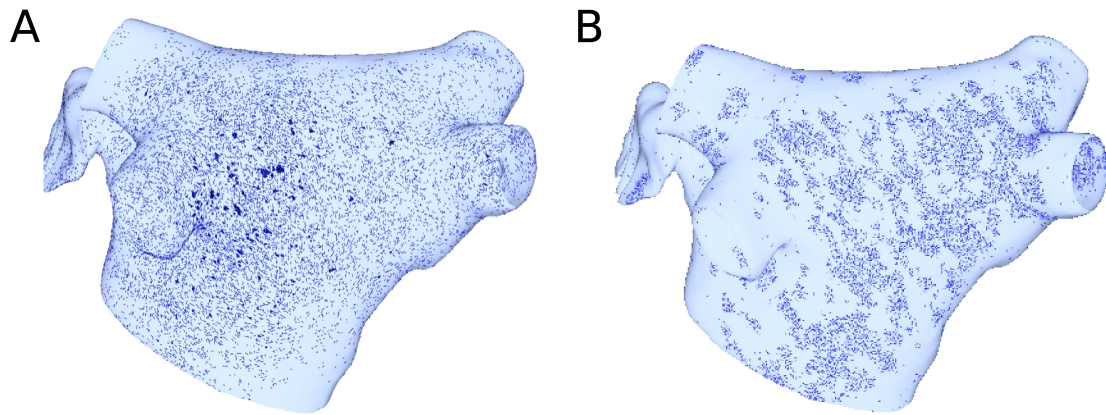

**Supplementary Figure 1.** *Structural remodeling was incorporated probabilistically based on late-gadolinium enhancement data. Mesh element edges were assigned as fibrosis from late-gadolinium enhancement likelihood data being either (A), averaged across 26 patients with pAF, or (B), directly from a single patient with a less dense and more sparse fibrosis distribution than the averaged population Cochet et al. (2015). Split mesh element edges and removed elements in (A) and (B) are marked in black.*

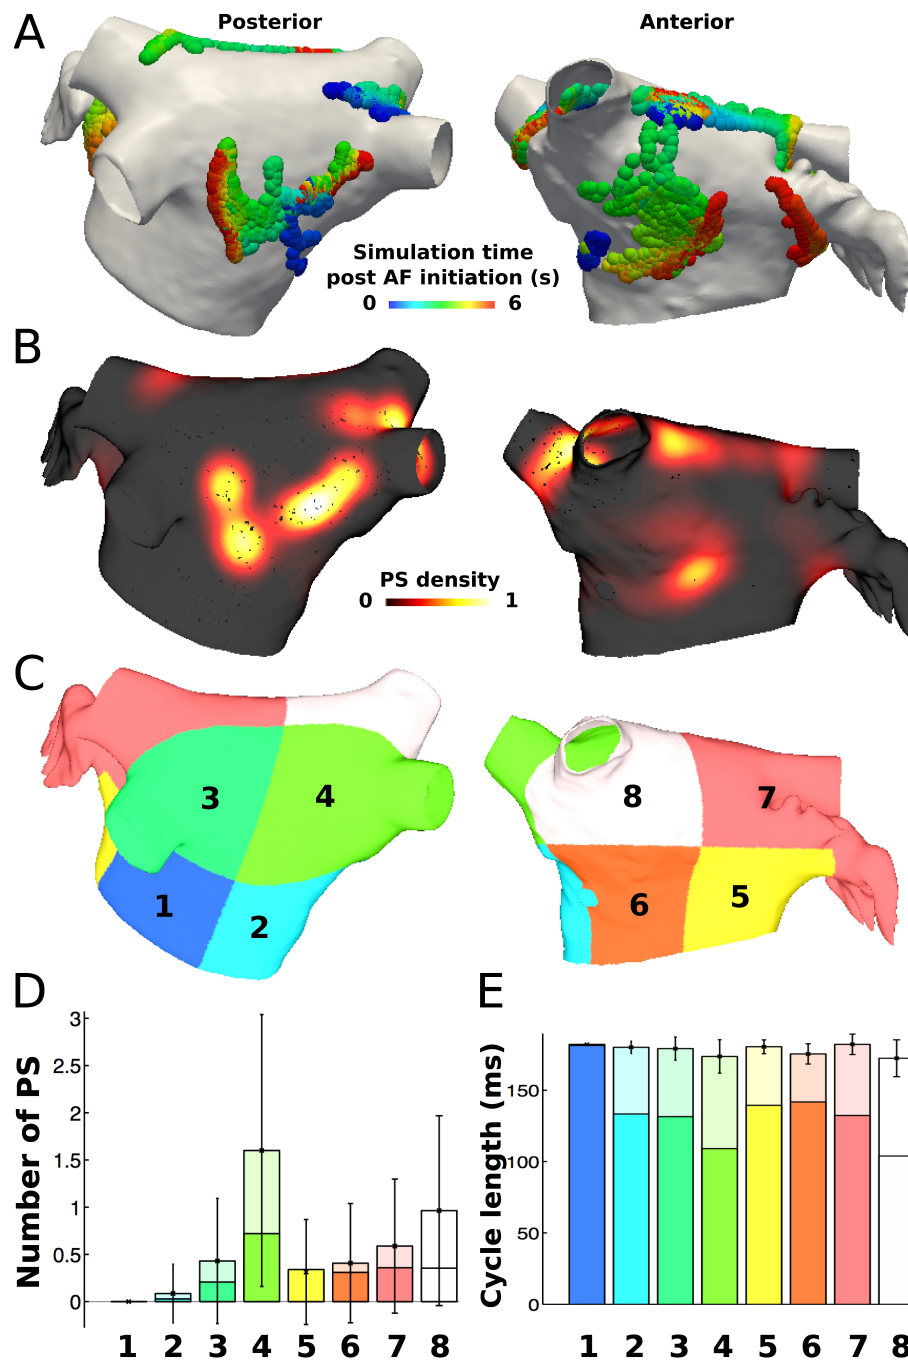

**Supplementary Figure 2.** PS locations during pAF from RSPV pacing the single patient fibrosis pAF bilayer model in supplementary Figure 1.B. (A) PS trajectories on the posterior (shown on the left) and anterior (shown on the right) walls, colored by time (ms) during the simulation post RSPV pacing. (B) Spatially smoothed PS density map showing the existence of multiple rotors on both the posterior and anterior walls that meandered significantly across each surface. (C) The eight LA subdivisions used for the analysis. (D) Regional assessment of the mean and standard deviation of PSs and the mean number of rotors (shown in a darker shade) over the duration of the simulation show that subdivisions 3 to 8 have comparable elevated PS densities. (E) Regional assessment of average CL for each vertex in the pAF bilayer model indicates that mean average CL is constant across subdivisions, while the minimum average CL varies (shown in a darker shade).

## 2 SUPPLEMENTARY MOVIE LIST

1. movie\_1.mov: pAF initiation via RSPV pacing. This movie corresponds to Figure 2.A in the manuscript. ([link](#))
2. movie\_2.mov: pAF initiation via LSPV pacing. This movie corresponds to Figure 2.C in the manuscript. ([link](#))
3. movie\_3.mov: pAF termination with 1.0 cm circular lesion applied to LA location #2. This figure corresponds to RSPV pacing results in Figure 6.A in the manuscript. ([link](#))
4. movie\_4.mov: pAF termination with 1.0 cm circular lesion applied to LA location #5. This figure corresponds to RSPV pacing results in Figure 6.A in the manuscript. ([link](#))
5. movie\_5.mov: pAF termination with 0.5 cm circular lesion applied to LA location #6. This figure corresponds to RSPV pacing results in Figure 6.A in the manuscript. ([link](#))
6. movie\_6.mov: pAF termination with 1.5 cm perforated circular lesion applied to LA location #3. This figure corresponds to RSPV pacing results in Figure 6.B in the manuscript. ([link](#))
7. movie\_7.mov: pAF termination with 0.5 cm perforated circular lesion applied to LA location #6. This figure corresponds to RSPV pacing results in Figure 6.B in the manuscript. ([link](#))
8. movie\_8.mov: pAF termination with 1.0 cm perforated circular lesion applied to LA location #6. This figure corresponds to RSPV pacing results in Figure 6.B in the manuscript. ([link](#))
9. movie\_9.mov: pAF termination with 1.0 cm perforated circular lesion applied to LA location #7. This figure corresponds to RSPV pacing results in Figure 6.B in the manuscript. ([link](#))
10. movie\_10.mov: pAF termination with 0.5 cm linear lesion applied to LA location #3. This figure corresponds to RSPV pacing results in Figure 6.C in the manuscript. ([link](#))
11. movie\_11.mov: pAF termination with 1.5 cm linear lesion applied to LA location #3. This figure corresponds to RSPV pacing results in Figure 6.C in the manuscript. ([link](#))
12. movie\_12.mov: pAF termination with 0.5 cm linear lesion applied to LA location #6. This figure corresponds to RSPV pacing results in Figure 6.C in the manuscript. ([link](#))
13. movie\_13.mov: pAF termination with 1.0 cm linear lesion applied to LA location #6. This figure corresponds to RSPV pacing results in Figure 6.C in the manuscript. ([link](#))
14. movie\_14.mov: pAF termination with 0.5 cm linear lesion applied to LA location #7. This figure corresponds to RSPV pacing results in Figure 6.C in the manuscript. ([link](#))
15. movie\_15.mov: pAF termination with 1.0 cm cross lesion applied to LA location #2. This figure corresponds to RSPV pacing results in Figure 6.D in the manuscript. ([link](#))
16. movie\_16.mov: pAF termination with 0.5 cm cross lesion applied to LA location #5. This figure corresponds to RSPV pacing results in Figure 6.D in the manuscript. ([link](#))
17. movie\_17.mov: pAF termination with 1.0 cm cross lesion applied to LA location #5. This figure corresponds to RSPV pacing results in Figure 6.D in the manuscript. ([link](#))
18. movie\_18.mov: Failed pAF termination with 1.0 cm circular lesion applied to LA location #3. This figure corresponds to RSPV pacing results in Figure 6.A in the manuscript. ([link](#))
19. movie\_19.mov: Failed pAF termination with 1.0 cm circular lesion applied to LA location #7. This figure corresponds to RSPV pacing results in Figure 6.A in the manuscript. ([link](#))
20. movie\_20.mov: Failed pAF termination with 1.5 cm cross lesion applied to LA location #3. This figure corresponds to RSPV pacing results in Figure 6.D in the manuscript. ([link](#))

21. movie\_21.mov: pAF termination with 5 RFA activation map streamlines. This figure corresponds to RSPV pacing results in Figure 8 in the manuscript. ([link](#))

---

**REFERENCES**

- Cochet, H., Mouries, A., Nivet, H., Sacher, F., Derval, N., Denis, A., et al. (2015). Age, atrial fibrillation, and structural heart disease are the main determinants of left atrial fibrosis detected by delayed-enhanced magnetic resonance imaging in a general cardiology population. *J Cardiovasc Electrophysiol* 26, 484–492. doi:10.1111/jce.12651
- Courtemanche, M., Ramirez, R. J., and Nattel, S. (1998). Ionic mechanisms underlying human atrial action potential properties: insights from a mathematical model. *Am J Physiol* 275, H301–H321
- Courtemanche, M., Ramirez, R. J., and Nattel, S. (1999). Ionic targets for drug therapy and atrial fibrillation-induced electrical remodeling: insights from a mathematical model. *Cardiovasc Res* 42, 477–489
